# Supplementary material
Source: Springer Nature journal article supplement (https://www.springermedizin.de/resource/supplementary/12939_2006_76_MOESM3_ESM.pdf/9551434)
Supplement: MOESM3 [file 9551434]

## 1st response to fever in children: Malawi DHS 2000

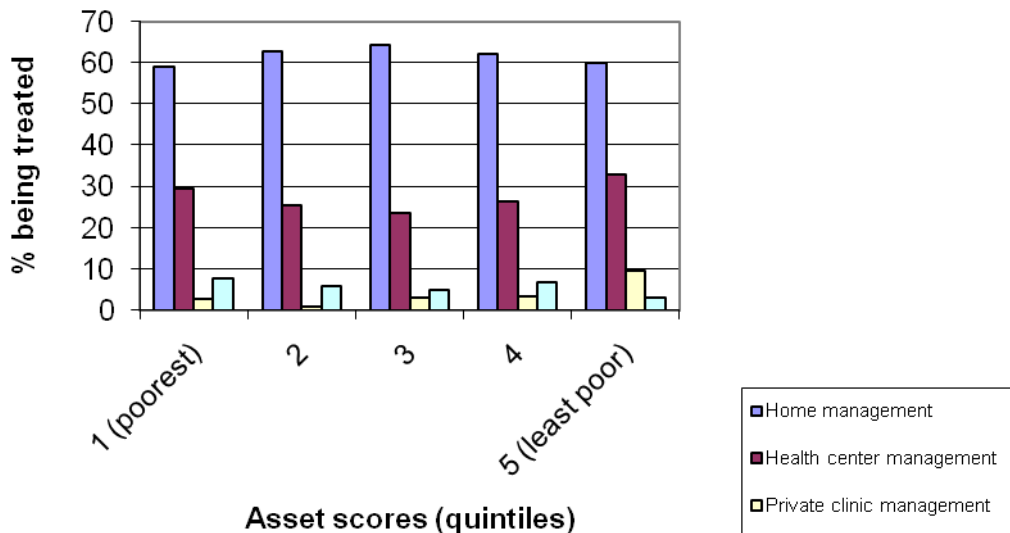

### Reaching the poorest of the poor

59% treated at home  
 29.6% treated at h/centre  
 2.9% treated at private clinic  
 7.8% did nothing

### Concentration Index

Home management = 0.004 (-0.02 – 0.02)  
 Health centre management = 0.01 (- 0.06 – 0.09)  
 Private Clinic = 0.3 (0.06 – 0.54)  
 Did nothing = -0.11 (-0.25 – 0.03)
